# Supplementary material for: Antigenicity of the Mu (B.1.621) and A.2.5 SARS-CoV-2 Spikes
Source: MDPI journal article supplement (doi:10.3390/v14010144), 2022-01-14
Supplement: s1 [file s1]

Supplementary Materials

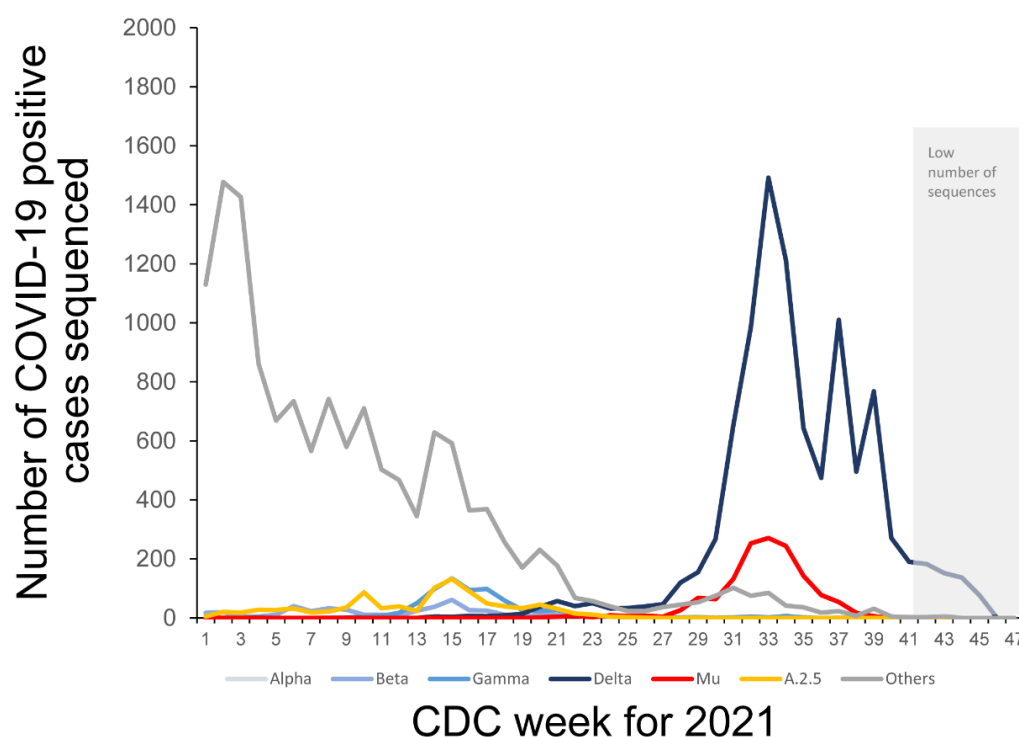

**Figure S1.** Distribution of COVID-19 positive cases sequenced by CDC week for variants Alpha, Beta, Gamma, Delta, Mu, A.2.5 and others. The Mu variant was present in Québec from CDC week 27 (4<sup>th</sup> of July) to CDC week 42 (17<sup>th</sup> of October). The A.2.5 variant was present at low level from the beginning of 2021 to CDC week 29 (18<sup>th</sup> of July).

**Table S1.** Binding Kinetics of the interaction between SARS-CoV-2 RBD and sACE2 quantified by Biolayer Interferometry.

| Ligands | Temperature | ACE2 binding<br>(RBD/biolayer interferometry) |                      |                       |
|---------|-------------|-----------------------------------------------|----------------------|-----------------------|
|         |             | KD (nM)                                       | Ka (1/Ms)            | Kdis (1/s)            |
| WT      | 10°C        | 57.19                                         | 2.68x10 <sup>4</sup> | 1.53x10 <sup>-3</sup> |
|         | 25°C        | 162.6                                         | 4.72x10 <sup>4</sup> | 7.68x10 <sup>-3</sup> |
| R346K   | 10°C        | 45.71                                         | 2.67x10 <sup>4</sup> | 1.22x10 <sup>-3</sup> |
|         | 25°C        | 166.4                                         | 4.64x10 <sup>4</sup> | 7.72x10 <sup>-3</sup> |
| K417N   | 10°C        | 120                                           | 5.09x10 <sup>4</sup> | 6.11x10 <sup>-3</sup> |
|         | 25°C        | 264.2                                         | 6.45x10 <sup>4</sup> | 1.70x10 <sup>-2</sup> |
| L452R   | 10°C        | 68.17                                         | 1.91x10 <sup>4</sup> | 1.30x10 <sup>-3</sup> |
|         | 25°C        | 148.3                                         | 2.98x10 <sup>4</sup> | 4.41x10 <sup>-3</sup> |
| E484K   | 10°C        | 56.39                                         | 2.99x10 <sup>4</sup> | 1.69x10 <sup>-3</sup> |
|         | 25°C        | 146.8                                         | 5.58x10 <sup>4</sup> | 8.18x10 <sup>-3</sup> |
| N501Y   | 10°C        | 11.47                                         | 2.91x10 <sup>4</sup> | 3.33x10 <sup>-3</sup> |
|         | 25°C        | 35.45                                         | 4.42x10 <sup>4</sup> | 1.57x10 <sup>-3</sup> |

**Table S2.** Summary of ACE2 Binding, plasma binding, and neutralization to variants.

| SARS CoV-2 Variants        | ACE2 binding <sup>a</sup> | Spike recognition by plasma <sup>b</sup>                              |                                                                                     | Neutralization (ID <sub>50</sub> ) <sup>c</sup>                       |                                                                                     |
|----------------------------|---------------------------|-----------------------------------------------------------------------|-------------------------------------------------------------------------------------|-----------------------------------------------------------------------|-------------------------------------------------------------------------------------|
|                            |                           | Naïve vaccinated<br>(3 week post vaccination of 2 <sup>nd</sup> dose) | Previously infected vaccinated<br>(3 week post vaccination of 2 <sup>nd</sup> dose) | Naïve vaccinated<br>(3 week post vaccination of 2 <sup>nd</sup> dose) | Previously infected vaccinated<br>(3 week post vaccination of 2 <sup>nd</sup> dose) |
| D614G                      | 1                         | 1                                                                     | 1                                                                                   | 1186.8 (1)                                                            | 2668.2 (1)                                                                          |
| B.1.351 ( <b>Beta</b> )    | 4.1                       | 0.70                                                                  | 0.84                                                                                | 190.4 (0.16)                                                          | 744.4 (0.27)                                                                        |
| B.1.617.2 ( <b>Delta</b> ) | 2.32                      | 0.58                                                                  | 0.58                                                                                | 325 (0.27)                                                            | 374.2 (0.14)                                                                        |
| B.1.621 ( <b>Mu</b> )      | 1.69                      | 0.66                                                                  | 0.63                                                                                | 145.5 (0.12)                                                          | 343.4 (0.12)                                                                        |
| A.2.5                      | 2.04                      | 0.72                                                                  | 0.71                                                                                | 361.3 (0.30)                                                          | 905 (0.33)                                                                          |

- a) ACE2-Fc binding was normalized to CV3-25 binding in each experiment. Values are presented as ratio of normalized ACE2-Fc binding obtain with the D614G Spike. Values represent the means of data obtained from at least three independent experiments.
- b) Plasma binding were normalized to CV3-25 in each experiment. Values are presented as ratio of normalized plasma binding obtained with the D614G Spike. Values represent the means of data obtained with 9-10 plasma from the same group.
- c) The ID<sub>50</sub> represents the plasma dilution to inhibit 50% of the infection of 293T-ACE2 cells by pseudo viruses bearing the indicated Spike. Values are presented as the means of ID<sub>50</sub> and in parenthesis as ratio of the ID<sub>50</sub> obtained with virus bearing the D614G Spike. Values represent the means of data obtained with 9-10 different plasma.
